# Supplementary material
Source: PubMed Central journal article supplement (PMC9109697)
Supplement: NIHMS1729699-supplement-supinfo.pdf [file NIHMS1729699-supplement-supinfo.pdf]

## **SUPPLEMENTARY INFORMATION**

### **Assessment of the CASP14 Assembly Predictions**

**Short title: CASP14 Assembly Assessment**

**Burcu Ozden<sup>1,2</sup>, Andriy Kryshchak<sup>3</sup>, Ezgi Karaca<sup>1,2</sup>**

<sup>1</sup> Izmir Biomedicine and Genome Center, 35340, Izmir, Turkey

<sup>2</sup> Izmir International Biomedicine and Genome Institute, Dokuz Eylul University, 35340, Izmir, Turkey

<sup>3</sup>Protein Structure Prediction Center, Genome and Biomedical Sciences Facilities, University of California, Davis, California, USA

#### **Correspondence**

Ezgi Karaca, email: [ezgi.karaca@ibg.edu.tr](mailto:ezgi.karaca@ibg.edu.tr)

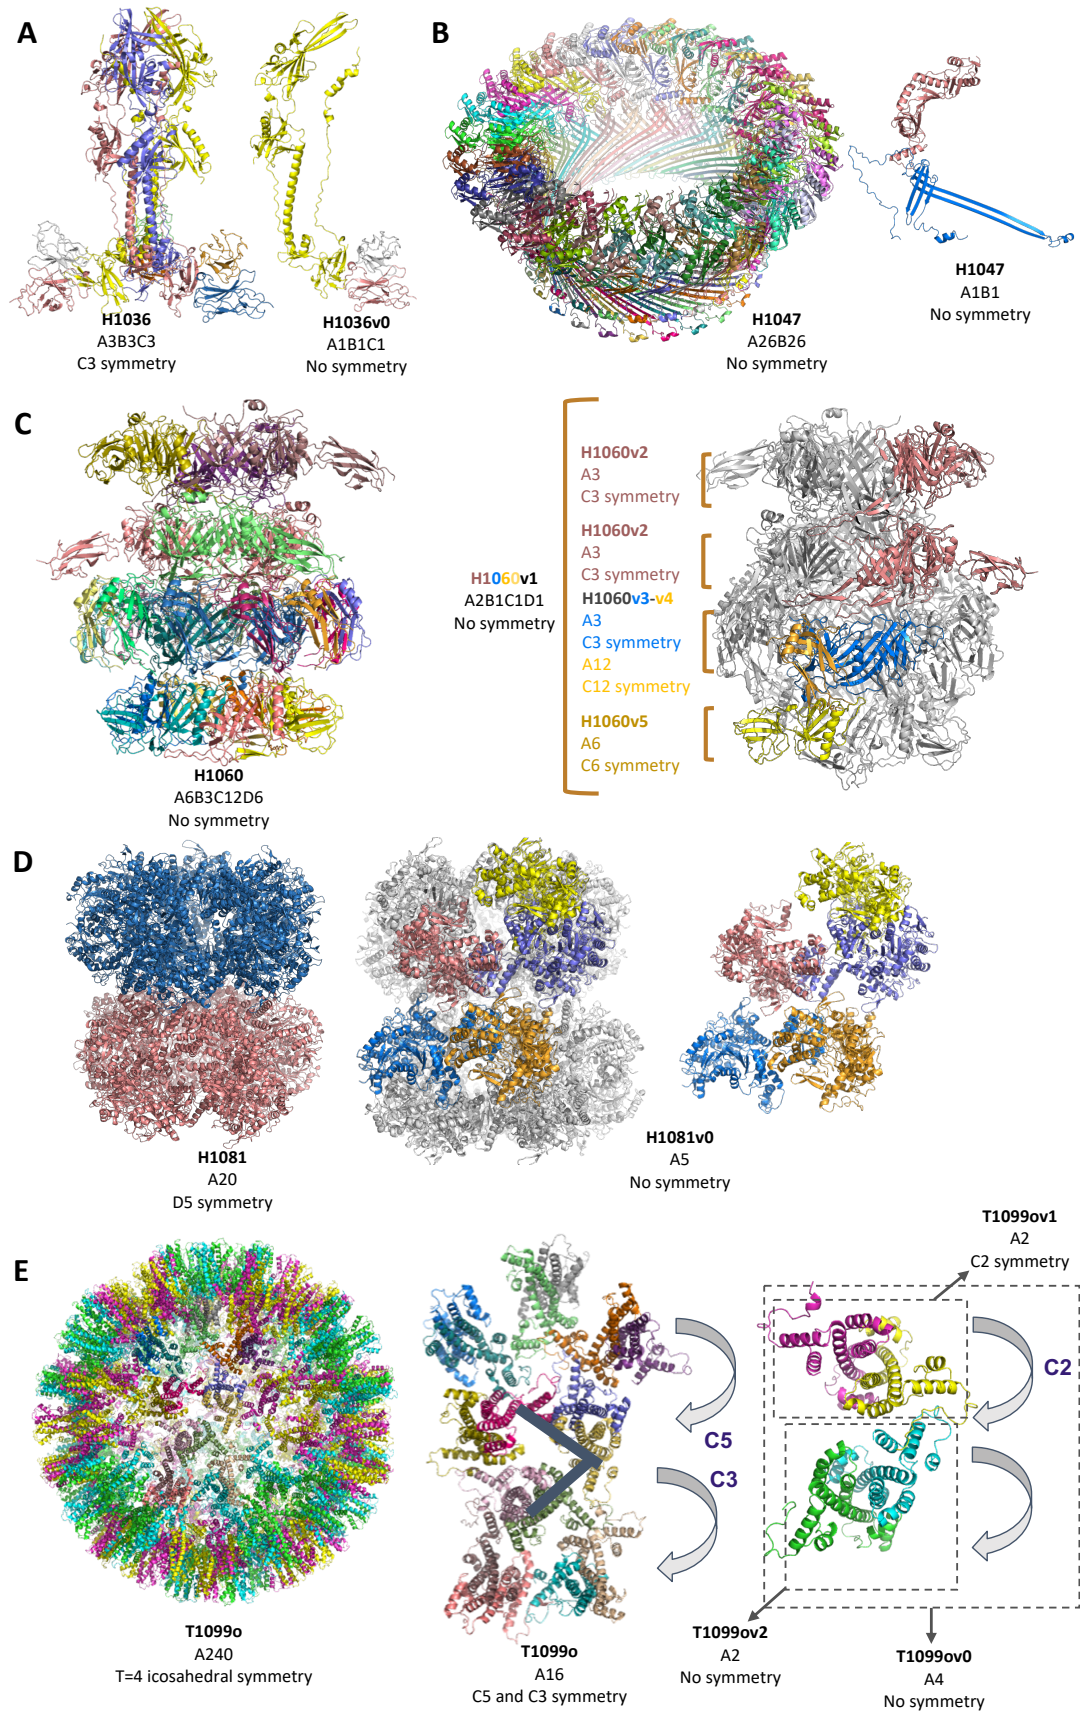

**Figure S1.** The targets which were assessed in evaluation units are presented with their global stoichiometry and symmetry information. **(A)** H1036 is the monoclonal antibody

bound to the virus with an A3B3C3 stoichiometry. Its evaluation unit H1036v0 has A1B1C1 stoichiometry, where the viral chain is colored with yellow in the evaluation unit. **(B)** H1047 is a A26B26 bacterial flagellar complex. It was assessed as dimer. The stoichiometry of the whole complex was not provided to the predictors. **(C)** H1060 is the bacteriophage T5 tail complex, which is composed of five stacked rings, made of four different monomers. These four rings separated as evaluation units H1060v2-v5. The vertical slice of each ring forms the H1060v1 evaluation unit. **(D)** H1081 is an arginine decarboxylase with A20 stoichiometry, composed of two stacked decamers, arranged in D5 symmetry. So, H1080v0 evaluation unit contains five monomers, which includes all the unique interfaces, repeating four times within the complex. **(E)** T1099o is the viral capsid of the duck hepatitis B virus with a T=4 icosahedral symmetry, composed of 240 subunits. The minimum subunit T1099v0 includes a C5 and C3 symmetry interface. It is separated into two dimers to cover all interfaces. T1099v1 has C2 symmetry, while T1099v2 does not have any symmetry.

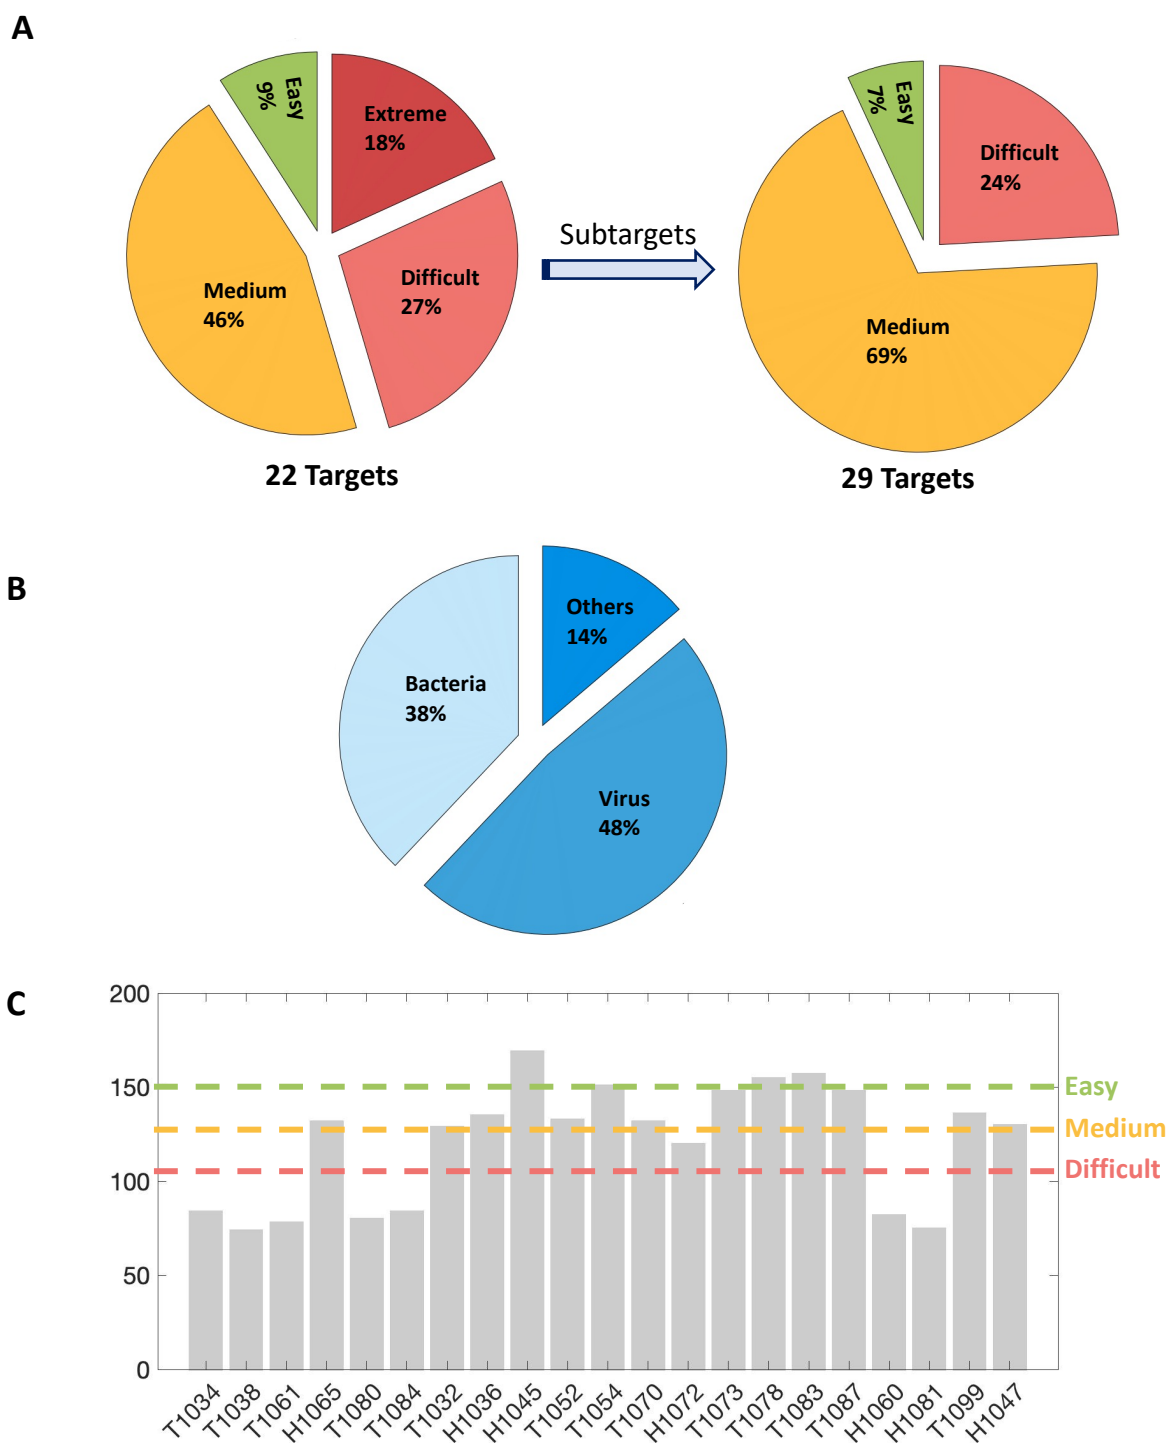

**Figure S2. (A)** The statistics of unique complexes (left) and the updated target classification, including the evaluation units (right). The targets, which were too large to assess with standard CASP metrics are labeled as extreme. **(B)** The taxonomic distributions of 29 targets (the complete set, including the evaluation units). **(C)** The number of models submitted for a given target. The average models submitted regarding each target difficulty are marked with dashed lines (green: easy, orange: medium, red: difficult)

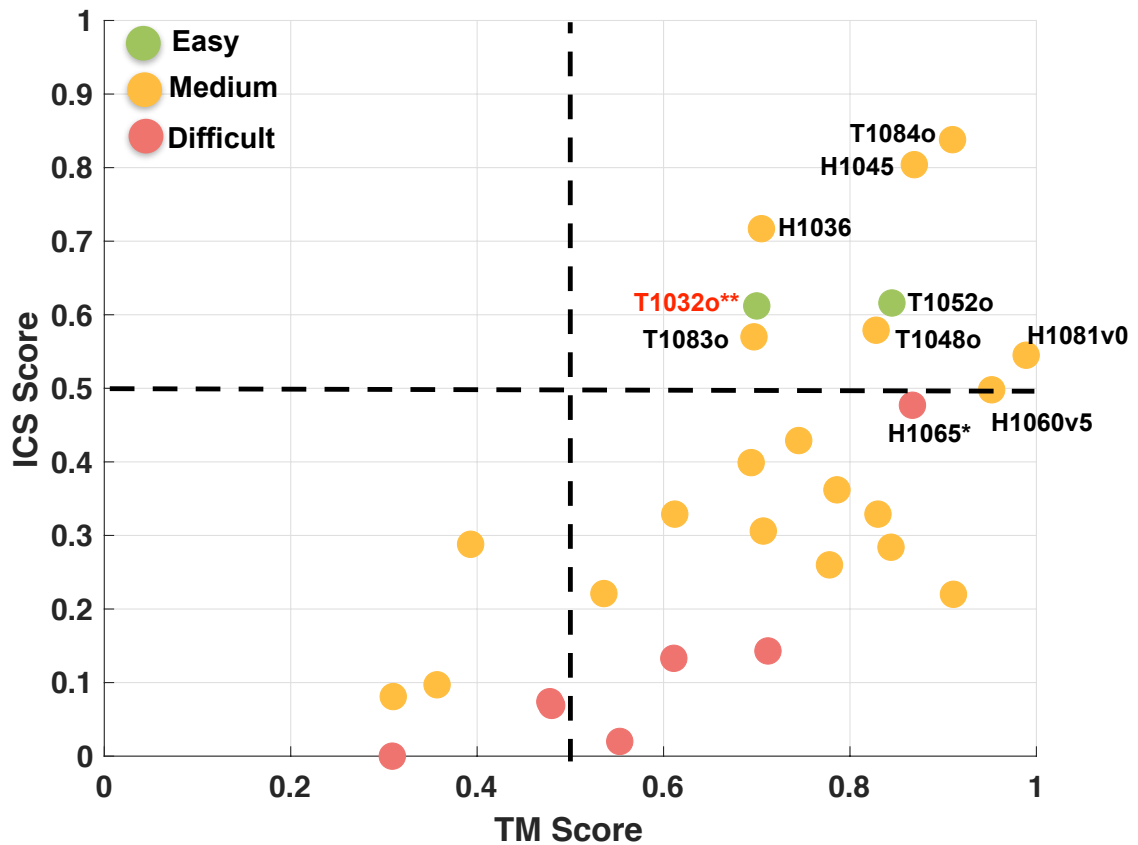

**Figure S3.** The ICS vs. TM distributions of the best models with respect to the target difficulty (green: easy, orange: medium, red: difficult). The successful target ids are denoted in black. T1032\*\* has its ICS, IPS and TM scores higher than 0.5. Though, the IDDT of this target is 0.41. Therefore, this model was considered unsuccessful. H1065\* was categorized as successful, since, while being a difficult target, its ICS score (0.48) can be rounded to 0.5.

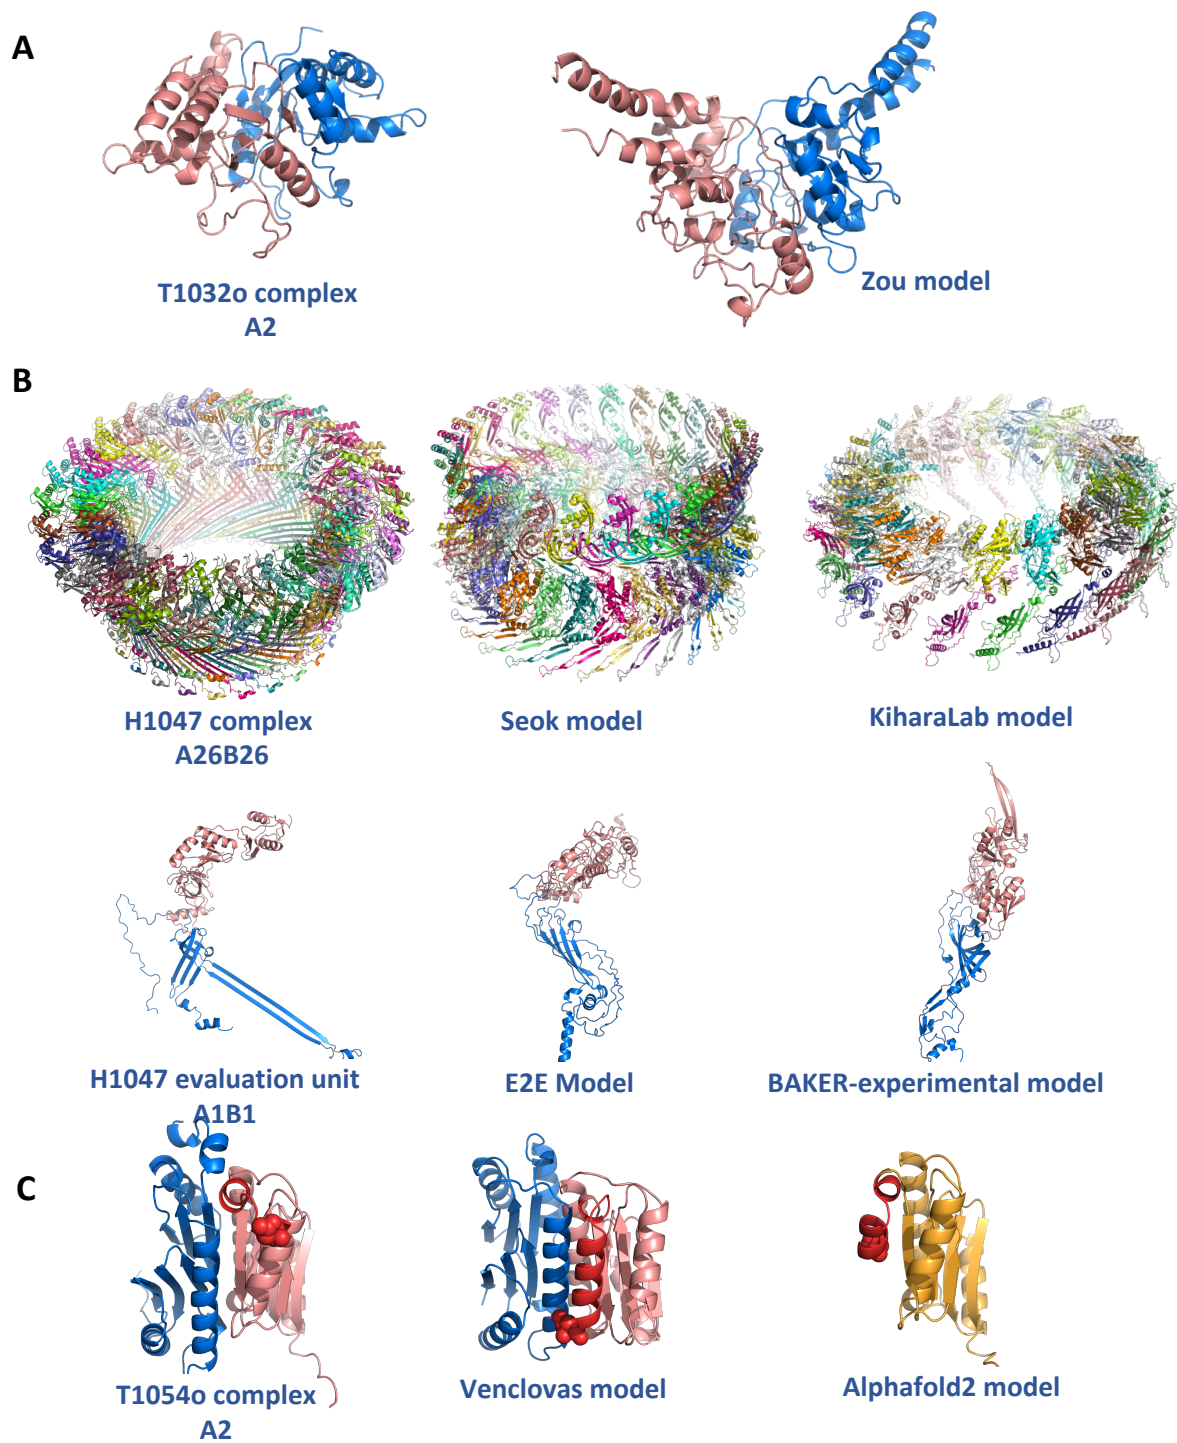

**Figure S4.** (A) T1032o target and the Zou model, having the best ICS score. (B) First row: H1047 complex and the assemblies submitted with correct stoichiometries (by Seok and KiharaLab). Second row: H1047 evaluation unit as dimer and the models with best TM scores, from E2E and BAKER-experimental. (C) The T1054o complex, together with the best assembly model submitted by Venclovas and the best tertiary structure prediction submitted by AlphaFold2. The first 20 amino acids, which blocks the actual interactions surface is shown in red spheres.

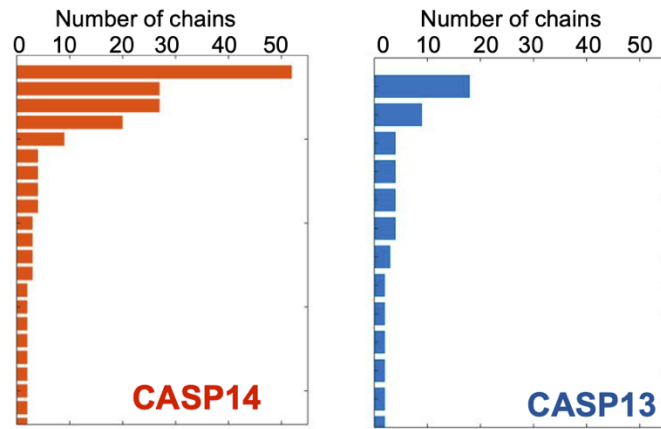

**Figure S5.** The frequencies of number of subunits present in the CASP14 and CASP13 assembly targets.

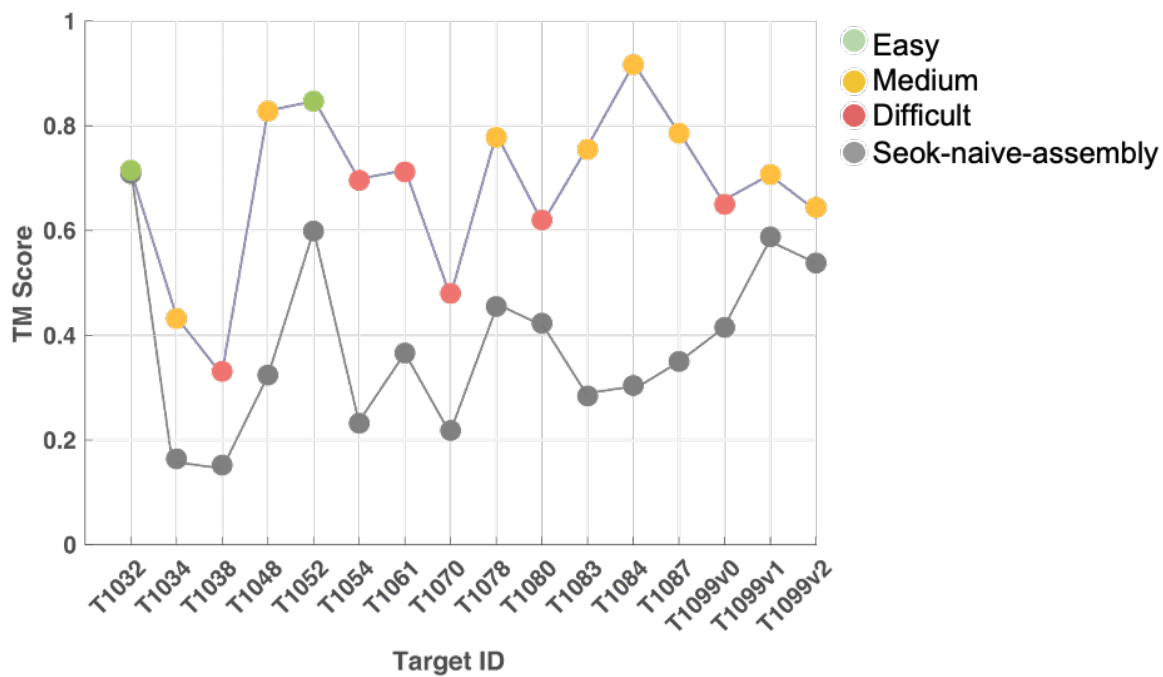

**Figure S6.** The TM scores of best homomeric models submitted compared with the TM scores of Seok-naïve-assembly models. The Seok-naïve-assembly are represented in gray circles, the rest are colored according to the difficulty level of the target (easy: green, medium: orange, difficult: red).



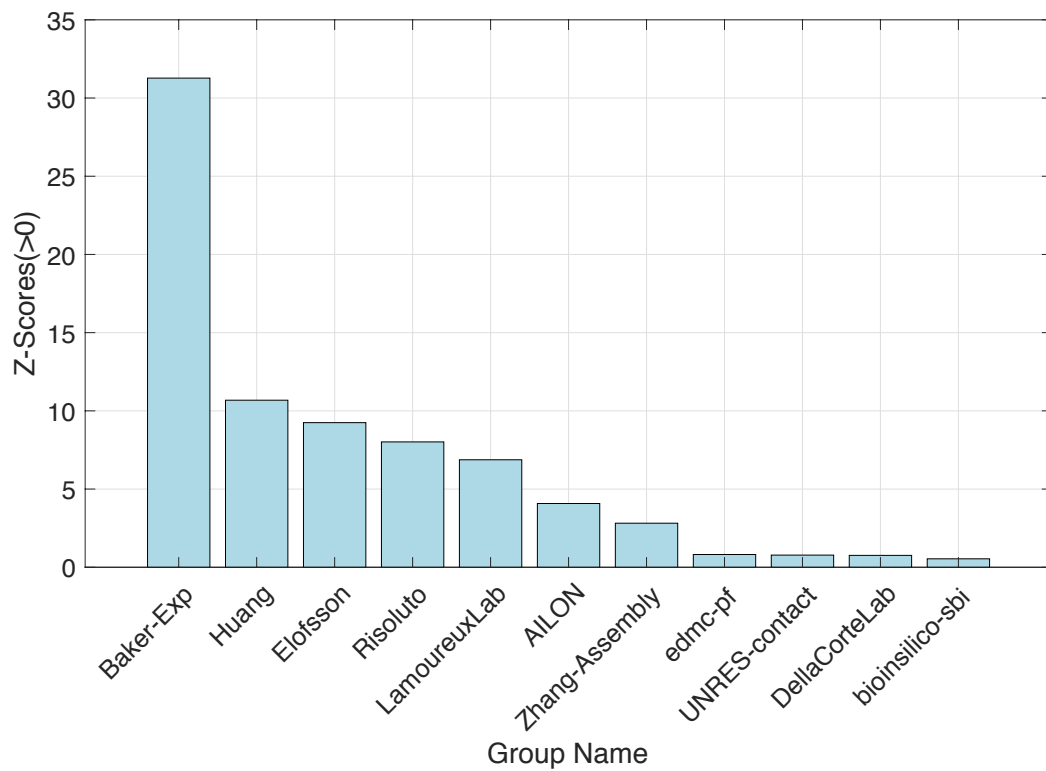

**Figure S7.** Z-scores-based ranking of the groups, which indicated the use of contact predictions in their CASP14 abstracts.

**Table S1.** The ranking of CASP groups, according to their best submitted models over 29 evaluation units (as published on the CASP14 server). \*\* denotes a missing target for that particular group, as the related submitted models could not pass the CASP validation system.

| No | Group name          | Group no | Number of participated targets | Score (Sum Z>0) | Ranking |
|----|---------------------|----------|--------------------------------|-----------------|---------|
| 1  | BAKER-experimental  | 403      | 29                             | 33.2402         | 1       |
| 2  | Venclovas           | 29       | 29                             | 25.9313         | 2       |
| 3  | Takeda-Shitaka-Lab  | 55       | 29                             | 22.0163         | 3       |
| 4  | Seok                | 193      | 28**                           | 18.535          | 4       |
| 5  | DATE                | 288      | 25                             | 17.1605         | 5       |
| 6  | Kiharalab           | 71       | 28                             | 14.0879         | 6       |
| 7  | Bates_BMM           | 336      | 29                             | 12.9151         | 7       |
| 8  | Huang               | 298      | 23                             | 11.8882         | 8       |
| 9  | Elofsson            | 472      | 22                             | 9.7202          | 9       |
| 10 | Ornate-select       | 375      | 23                             | 9.3433          | 10      |
| 11 | VoroCNN-select      | 343      | 28                             | 9.1835          | 11      |
| 12 | Risoluto            | 341      | 29                             | 8.559           | 12      |
| 13 | Vakser              | 173      | 25                             | 8.4447          | 13      |
| 14 | Seok-assembly       | 451      | 24                             | 7.9951          | 14      |
| 15 | SBROD-select        | 62       | 24                             | 7.5175          | 15      |
| 16 | LamoureuxLab        | 66       | 22                             | 6.9113          | 16      |
| 17 | UNRES-template      | 18       | 22                             | 6.3225          | 17      |
| 18 | AILON               | 192      | 12                             | 4.4694          | 18      |
| 19 | McGuffin            | 220      | 13                             | 4.24            | 19      |
| 20 | Zhang-Assembly      | 182      | 11                             | 3.4158          | 20      |
| 21 | E2E                 | 376      | 2                              | 3.1912          | 21      |
| 22 | Seok-naive_assembly | 491      | 16                             | 3.0485          | 22      |
| 23 | UNRES               | 360      | 21                             | 2.5229          | 23      |
| 24 | ricardo             | 467      | 6                              | 1.8131          | 24      |
| 25 | UNRES-contact       | 96       | 13                             | 1.6878          | 25      |
| 26 | DellaCorteLab       | 323      | 13                             | 1.3089          | 26      |
| 27 | edmc_pf             | 387      | 1                              | 0.8579          | 27      |
| 28 | bioinsilico_sbi     | 196      | 6                              | 0.8031          | 28      |
| 29 | DELCLAB             | 369      | 16                             | 0.7464          | 29      |
| 30 | xianmingpan         | 14       | 5                              | 0.587           | 30      |
| 31 | CAO-QA1             | 217      | 7                              | 0.5066          | 31      |
| 32 | ropius0             | 254      | 3                              | 0.4208          | 32      |
| 33 | Pharmulator         | 340      | 7                              | 0.2172          | 33      |
| 34 | Spider              | 349      | 6                              | 0.2058          | 34      |
| 35 | ict-ams             | 476      | 3                              | 0.1943          | 35      |
| 36 | MULTICOM-CLUSTER    | 75       | 1                              | 0.0521          | 36      |
| 37 | Jones-UCL           | 304      | 1                              | 0               | 37      |
| 38 | BAKER-ROBETTA       | 278      | 1                              | 0               | 37      |
| 39 | FoldEM              | 107      | 1                              | 0               | 37      |

**Table S2.** The ranking of CASP and CAPRI groups, according to their best submitted models over 19 evaluation units (as published on the CASP14 server). The CAPRI groups are marked with \*. \*\* denotes a missing target for that particular group, as the related submitted models could not pass the CASP validation system.

| No | Group name          | Group no | Number of participated targets | Score (Sum Z>0) | Ranking |
|----|---------------------|----------|--------------------------------|-----------------|---------|
| 1  | BAKER-experimental  | 403      | 19                             | 18.5925         | 1       |
| 2  | Venclovas           | 29       | 19                             | 17.3622         | 2       |
| 3  | Takeda-Shitaka-Lab  | 55       | 19                             | 16.2411         | 3       |
| 4  | Seok                | 193      | 18**                           | 15.4096         | 4       |
| 5  | Zou                 | 177*     | 19                             | 13.9369         | 5       |
| 6  | Kiharalab           | 71       | 19                             | 11.7287         | 6       |
| 7  | DATE                | 288      | 15                             | 9.5991          | 7       |
| 8  | CoDock              | 477*     | 13**                           | 9.1612          | 8       |
| 9  | CAPRI-Shen          | 103*     | 10                             | 8.1517          | 9       |
| 10 | PierceLab           | 279*     | 10                             | 8.124           | 10      |
| 11 | Bates_BMM           | 336      | 19                             | 7.4713          | 11      |
| 12 | Huang               | 298      | 13                             | 7.2065          | 12      |
| 13 | Elofsson            | 472      | 16                             | 7.118           | 13      |
| 14 | Fernandez-Recio     | 099*     | 13                             | 6.9312          | 14      |
| 15 | Seok-assembly       | 451      | 14                             | 6.4848          | 15      |
| 16 | Vakser              | 173      | 15                             | 6.0925          | 16      |
| 17 | Ornate-select       | 375      | 13                             | 5.856           | 17      |
| 18 | Risoluto            | 341      | 19                             | 5.5354          | 18      |
| 19 | Kozakov-Vajda       | 221*     | 12                             | 5.4261          | 19      |
| 20 | Kiharalab_Assembly  | 285*     | 18                             | 5.18            | 20      |
| 21 | LamoureuxLab        | 66       | 14                             | 5.1204          | 21      |
| 22 | SBROD-select        | 62       | 14                             | 4.7462          | 22      |
| 23 | VoroCNN-select      | 343      | 18                             | 4.6556          | 23      |
| 24 | UNRES-template      | 18       | 19                             | 4.3384          | 24      |
| 25 | CLUSPRO             | 155*     | 13                             | 3.4028          | 25      |
| 26 | htjcadd             | 191*     | 7                              | 3.3123          | 26      |
| 27 | McGuffin            | 220      | 7                              | 2.9804          | 27      |
| 28 | Zhang-Assembly      | 182      | 7                              | 2.5437          | 28      |
| 29 | Seok-naive_assembly | 491      | 10                             | 1.9448          | 29      |
| 30 | UNRES               | 360      | 18                             | 1.7575          | 30      |
| 31 | bio3d               | 418*     | 2                              | 1.6869          | 31      |
| 32 | AILON               | 192      | 8                              | 1.4871          | 32      |
| 33 | ricardo             | 467      | 4                              | 1.1947          | 33      |
| 34 | UNRES-contact       | 96       | 10                             | 1.0485          | 34      |
| 35 | MULTICOM-AI         | 275*     | 6                              | 0.8746          | 35      |
| 36 | edmc_pf             | 387      | 1                              | 0.8579          | 36      |
| 37 | bioinsilico_sbi     | 196      | 6                              | 0.8031          | 37      |
| 38 | DELCLAB             | 369      | 9                              | 0.6383          | 38      |
| 39 | DellaCorteLab       | 323      | 9                              | 0.5806          | 39      |
| 40 | CAO-QA1             | 217      | 3                              | 0.4249          | 40      |
| 41 | ropius0             | 254      | 3                              | 0.4208          | 41      |
| 42 | ict-ams             | 476      | 2                              | 0.1943          | 42      |
| 43 | xianmingpan         | 14       | 2                              | 0.0558          | 43      |
| 44 | MULTICOM-CLUSTER    | 75       | 1                              | 0.0521          | 44      |
| 45 | Pharmulator         | 340      | 3                              | 0               | 45      |
| 46 | FoldEM              | 107      | 1                              | 0               | 45      |
| 47 | Spider              | 349      | 3                              | 0               | 45      |
